# Supplementary material for: Ultrathin Ni(ii)-based coordination polymer nanosheets as a co-catalyst for promoting photocatalytic H2-production
Source: Royal Society of Chemistry journal article supplement (doi:10.1039/c9cc02680k), 2019-01-01
Supplement: c9cc02680k1.pdf [file c9cc02680k1.pdf]

*Electronic Supplementary Information (ESI) for*

## **Ultrathin Ni (II)-based Coordination Polymer Nanosheets for Co-catalyst Promoting Photocatalytic H<sub>2</sub>-production**

Zhi-Qiang Jiang,<sup>a\*</sup> Xing-Liang Chen,<sup>a</sup> Jin Lu,<sup>a</sup> Yu-Feng Li,<sup>a</sup> Tian Wen <sup>b\*</sup> and Lei Zhang<sup>b</sup>

[a] Zhi-Qiang Jiang, Xing-Liang Chen, Jin Lu, Yu-Feng Li

Deep-processing of Fine Flake Graphite Sichuan Province Key Laboratory of Colleges and Universities, Panzhihua University, Panzhihua, Sichuan, 617000, P. R. China.

E-mail: myjiangzq@163.com

[b] T. Wen and Lei Zhang,

School of Chemistry, The University of Melbourne, Parkville, Victoria 3010, Australia.

E-mail: tian.wen@unimelb.edu.au

## **Part I: Experimental Section**

### **1.1 Materials synthesis**

#### **Ni-CPs Crystals**

Typically, a mixture of 4,4'-Bipyridine (0.11g),  $\text{Ni}(\text{ClO}_4)_2 \cdot 6\text{H}_2\text{O}$  (0.586g) and  $\text{H}_2\text{O}$  (5ml) was mixed in a 23 ml Teflon, which was heated at 130 °C for 2 days and then cooled to room temperature. The blue crystals (**Ni-CPs**) were obtained.

#### **few-layer Ni-CPs nanosheets (Ni-CPNS)**

The fresh bulk Ni- CPNS were fabricated by a liquid-phase exfoliation using an ultrasonic probe in absolute ethanol. In detail, the fresh bulk Ni- CPs crystals (50 mg) was added in ethanol, and ultra-sonicated for 8 hours. Subsequently, the dispersion was centrifuged to collect the supernatant.

#### **CdS nanoparticle (Cd NP)**

CdS nanoparticle was synthesized by a precipitation-hydrothermal strategy. For example, 1.09 g  $\text{Cd}(\text{Ac})_2 \cdot 2\text{H}_2\text{O}$  was added into 23.5 ml deionized water followed by stirring for 2 hour. Then 6.5 ml 0.92 M  $\text{Na}_2\text{S}$  aqueous solution was added dropwise into the above solution, followed by stirring for 3 hours. Finally, the mixed solution was transferred to a 60 ml Teflon-lined autoclave and heated at 180 °C for 12 hours. Then it cooled to room temperature, the obtained yellow samples (Cd NP) were washed by deionized water and ethanol for three times, respectively.

#### **Ni-CPNS coupled CdS nanoparticle (Ni-CPNS@CdS)**

Ni-CPNS@CdS was obtained by mechanically mixing the Ni-CPNS ethanol solution with the CdS NP in a mortar inside a glovebox under the Argon gas conditions. Typically, 20 mg of as-synthesized CdS NP mixed Ni-CPNS (e.g., 3mg), which were added into the mortar and followed by addition ethanol solution. Then the sample a was mechanically ground for 20 min inside the glovebox. Finally, the nominal weight Ni-CPNS loaded on to CdS were 13 wt.% for the final product. The procedure for fabrication of different content Ni-CPNS loaded on to CdS (1.5, 5.7, 13, 18 and 22.0 wt.%) was the same as that for 13 wt.%.

### **1.2 Main Physicochemical Characterization**

All powder X-ray diffraction (PXRD) analyses were studied by a Rigaku Dmax2500

diffractometer with Cu K $\alpha$  radiation. UV-Visible diffuse reflectance spectra were acquired on a UV-Vis spectrophotometer. Steady-state photoluminescence spectra and time-resolved PL decay curves were measured at room temperature. XPS was tested on a VG ESCALAB 210 XPS spectrometer system with Mg Ksource. The XANES measurements were carried out at the Australian Synchrotron.

### **1.3 Photocatalytic H<sub>2</sub> production test**

The photocatalytic H<sub>2</sub> production were evaluated in a 100 ml Pyrexflask, followed the 300 W Xenon arc lamp, which equipped with a UV-cutoff filter ( $\lambda \geq 420$  nm) was used as the light source to drive the photocatalytic reaction.

## Part II: Supplementary Results

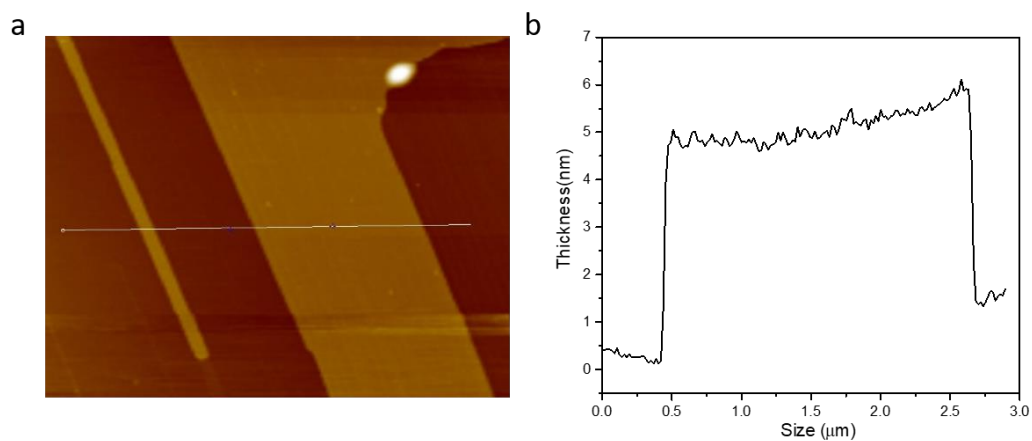

**Fig. S1.** AFM image of ultra-thin Ni-CPNS (a) and the corresponding height profiles (b).

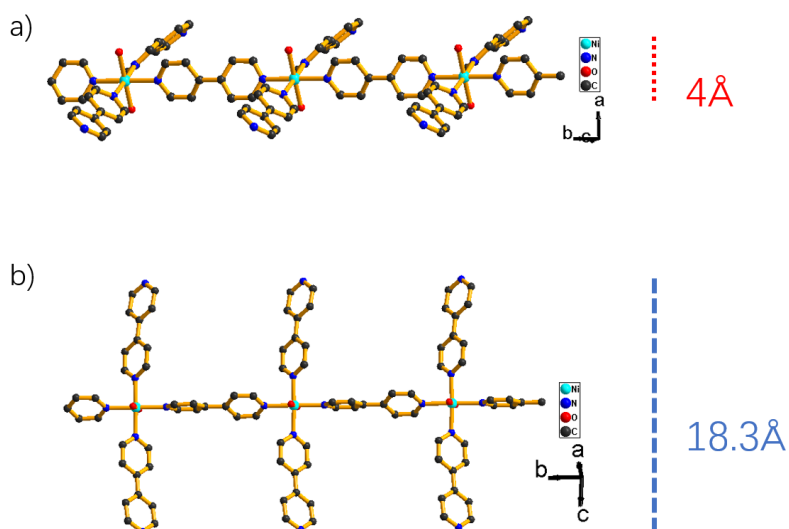

**Fig. S2.** The thickness of Ni-CPs single chain with  $\sim 4\text{\AA}$  (a) or  $\sim 18\text{\AA}$  corresponding to metal coordination layer and 4, 4'-bipyridine ligands, respectively.

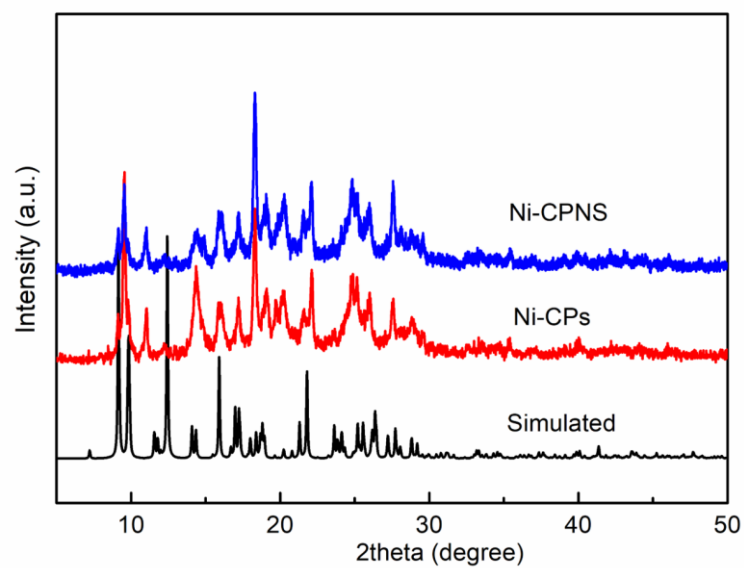

**Fig. S3.** The PXRD patterns of Ni-CPs and Ni-CPNS.

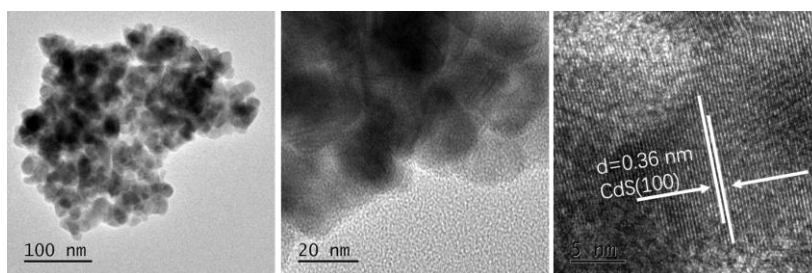

**Fig. S4.** The typical TEM images of CdS nanoparticles.

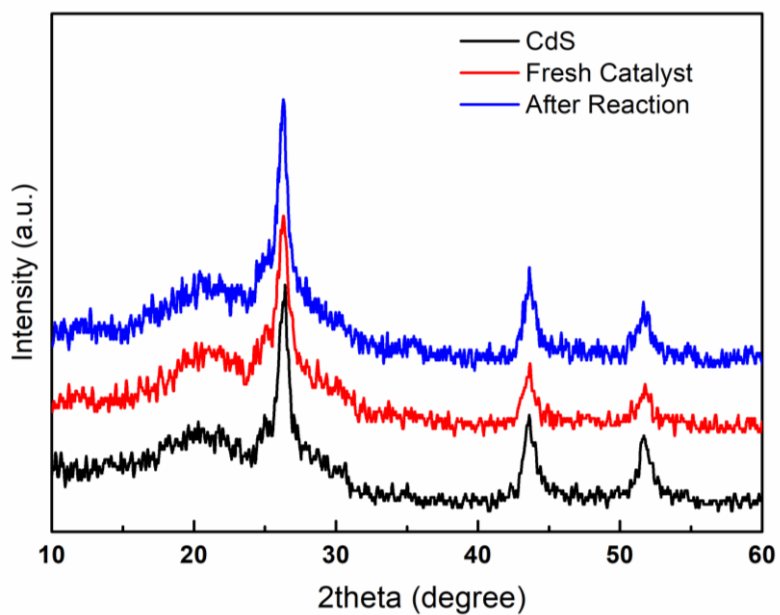

**Fig. S5.** The XRD patterns of CdS and Ni-CPNS@CdS before and after reaction.

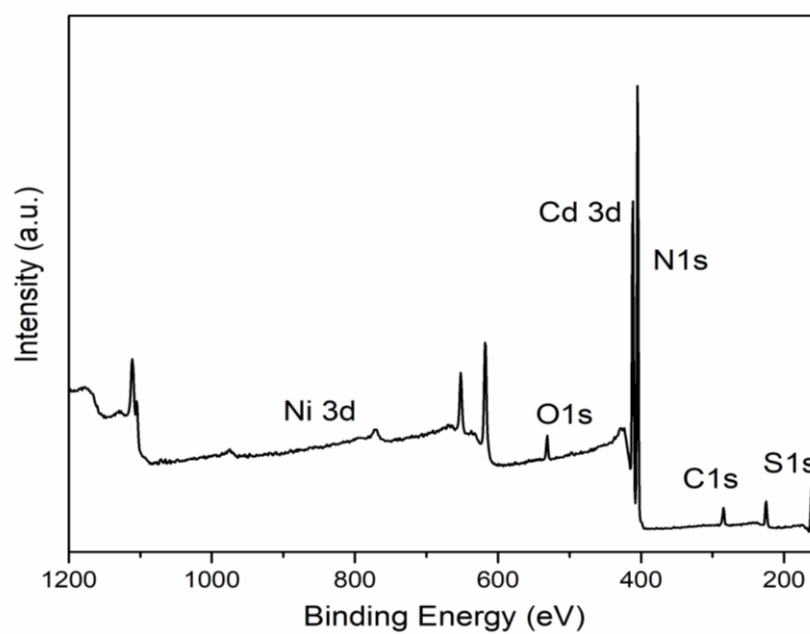

**Fig. S6.** XPS survey of Ni-CPNS@CdS.

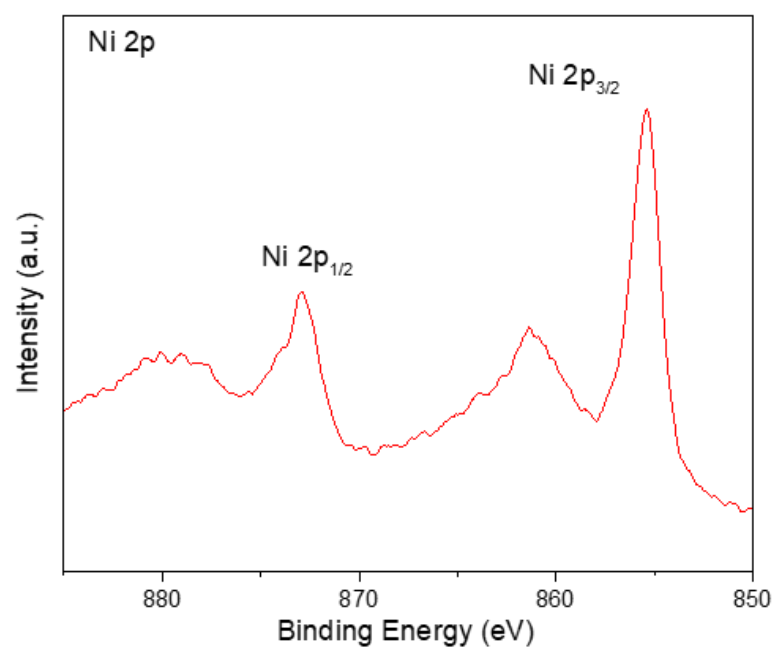

**Fig. S7.** XPS spectra of the Ni 2p in the Ni-CPNS@CdS.

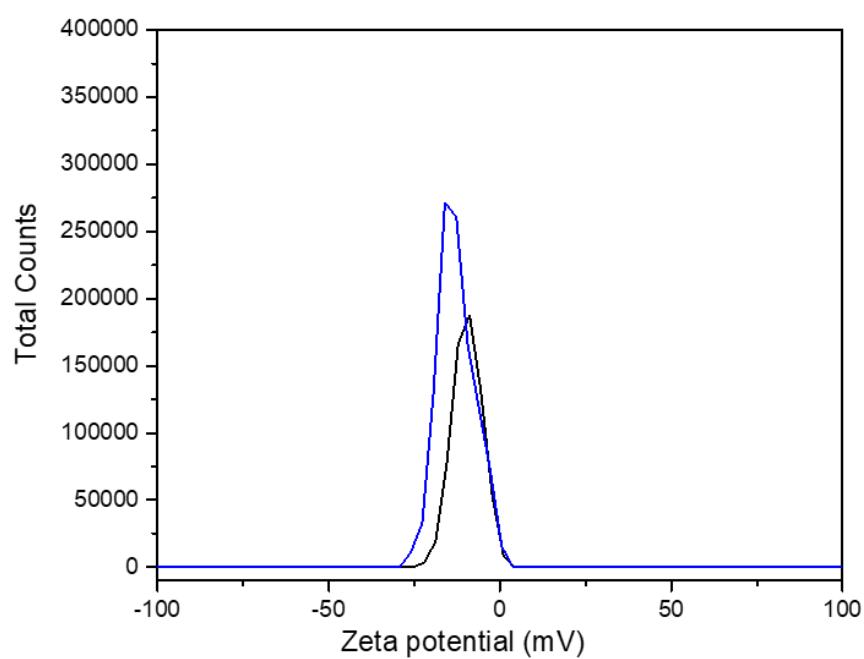

**Fig. S8.** The Zeta potential of the CdS (black line) and Ni-CPNS@CdS (blue line).

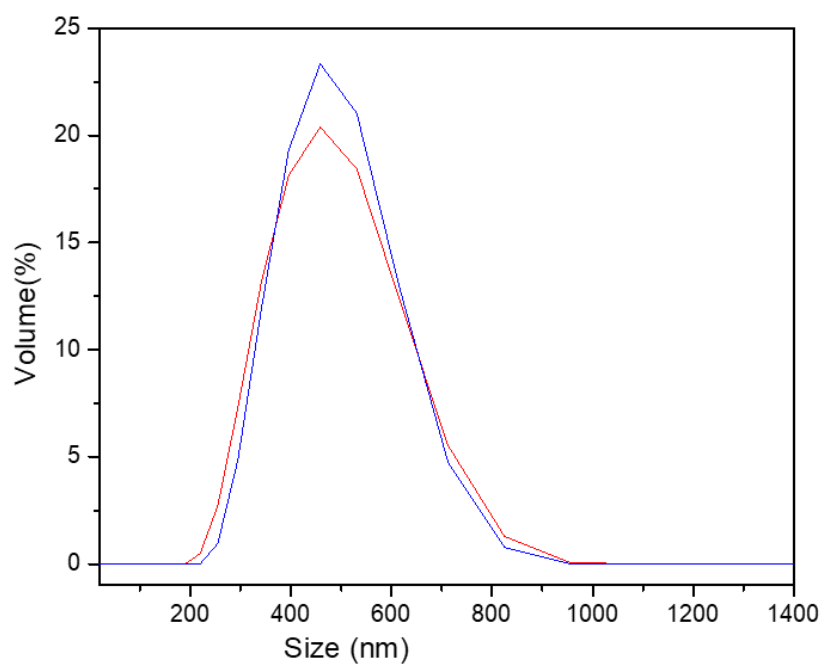

**Fig. S9.** The particle size distribution of the CdS (red line) and Ni-CPNS@CdS (blue line).

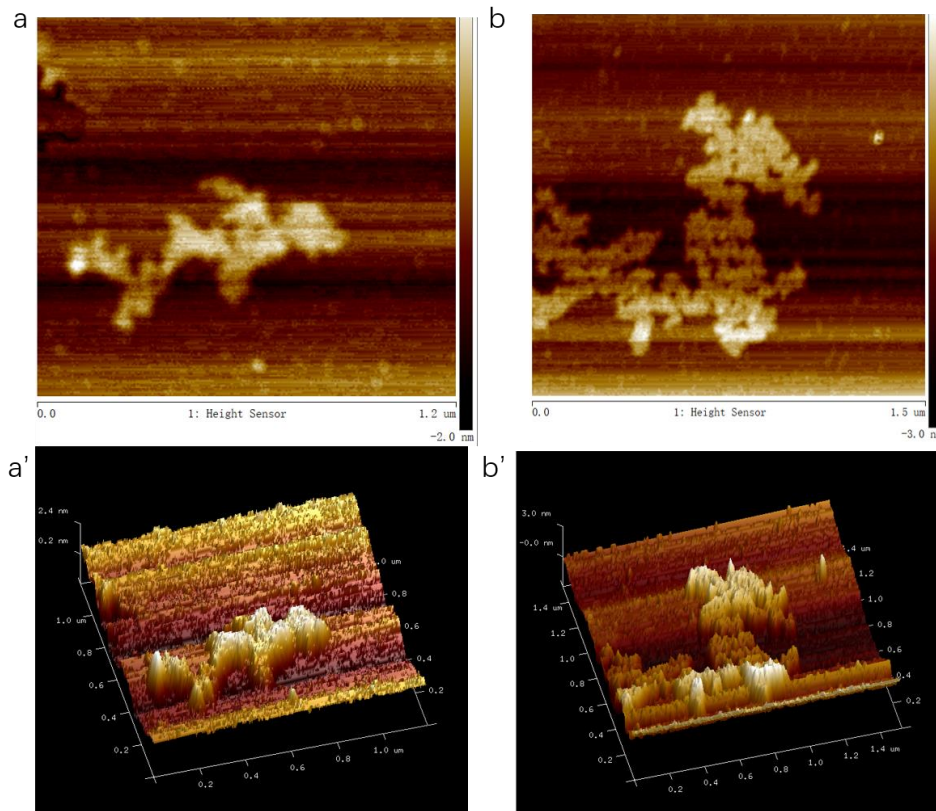

**Fig. S10.** AFM images of Ni-CPNS@CdS.



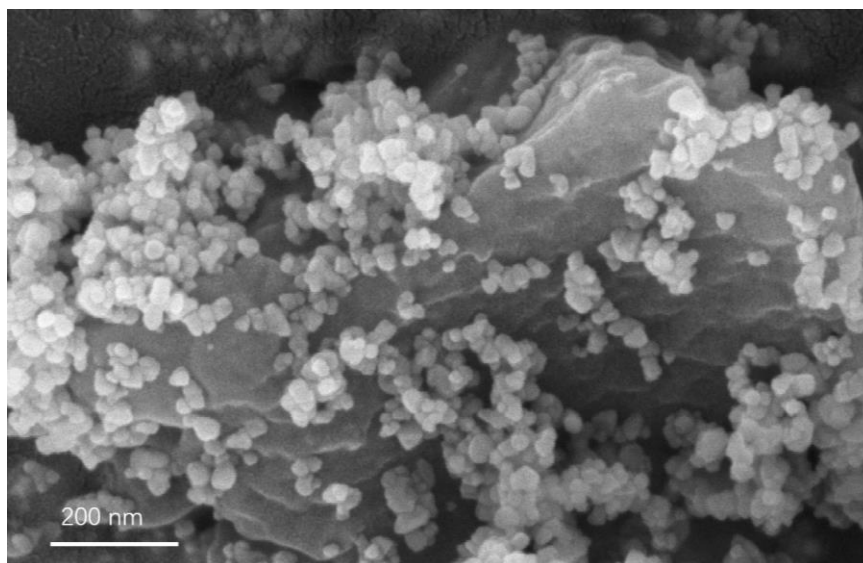

**Fig. S11.** SEM image of bulk Ni-CPs with CdS NPs after grinding.

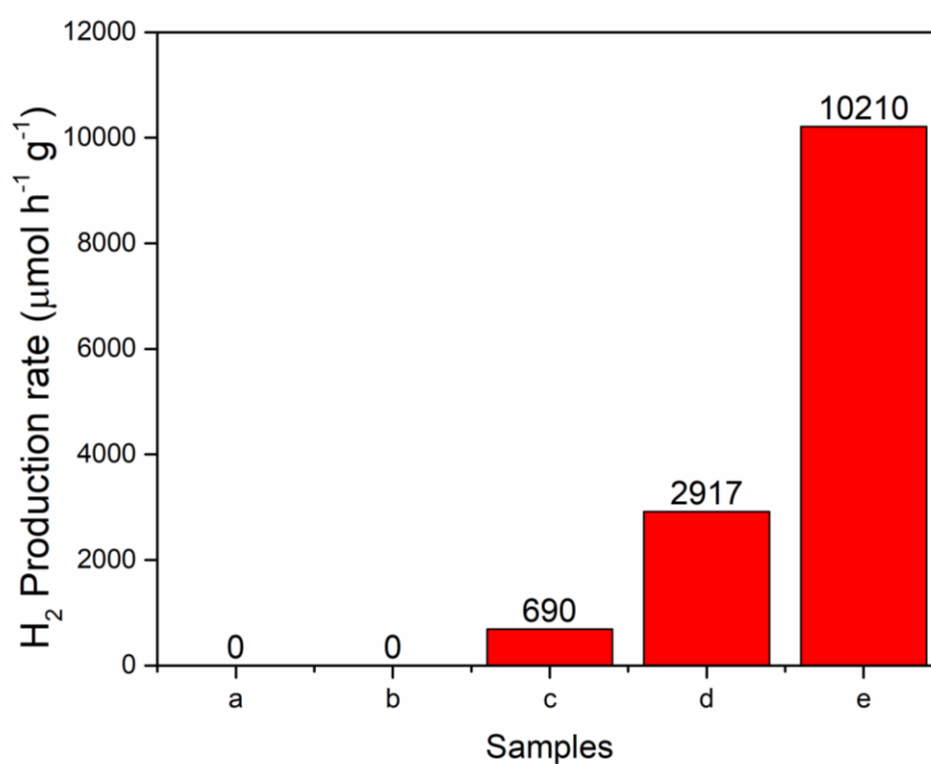

**Fig. S12.** A comparison of the photocatalytic H<sub>2</sub>-production activities of Ni-CPs (a: Ni-CPs), Ni-CPNS (b: Ni-CPNS), CdS (c) and co-catalysts (d: Ni-CPs@CdS; e: Ni-CPNS@CdS).

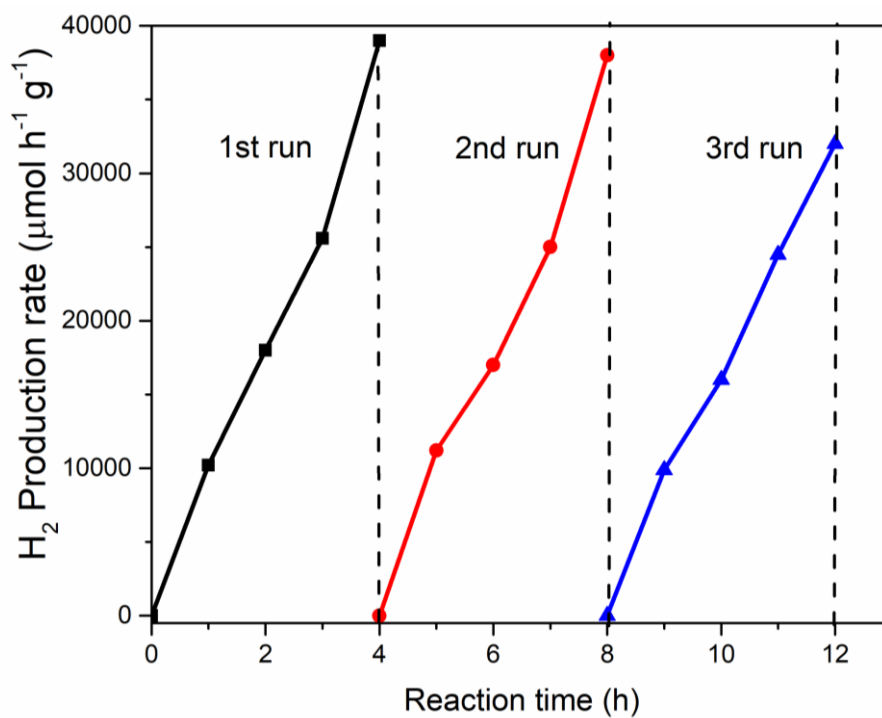

**Fig. S13.** Time course of H<sub>2</sub> production over Ni-CPNS@CdS under visible-light.

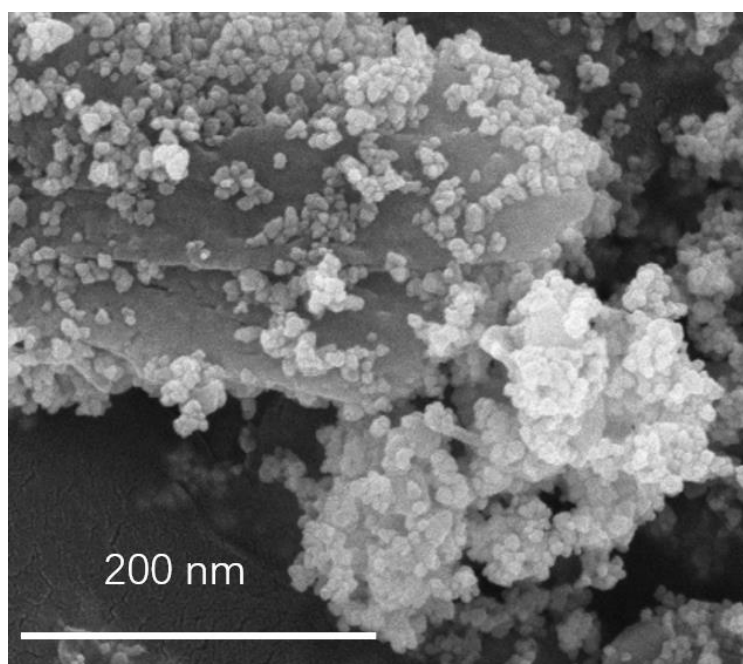

**Fig. S14.** SEM image of Ni-CPNS@CdS after photocatalyze H<sub>2</sub> evolution under visible-light.

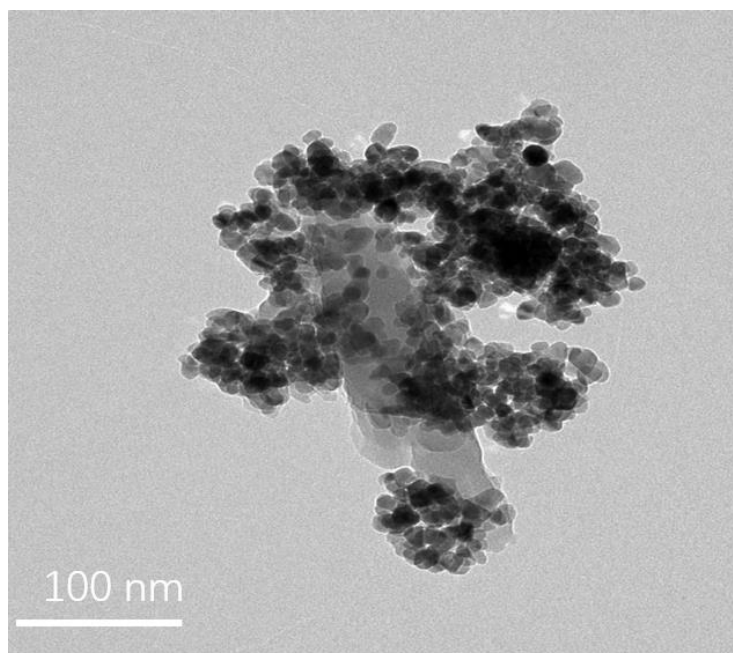

**Fig. S15.** TEM image of Ni-CPNS@CdS after photocatalytic H<sub>2</sub> evolution under visible-light.

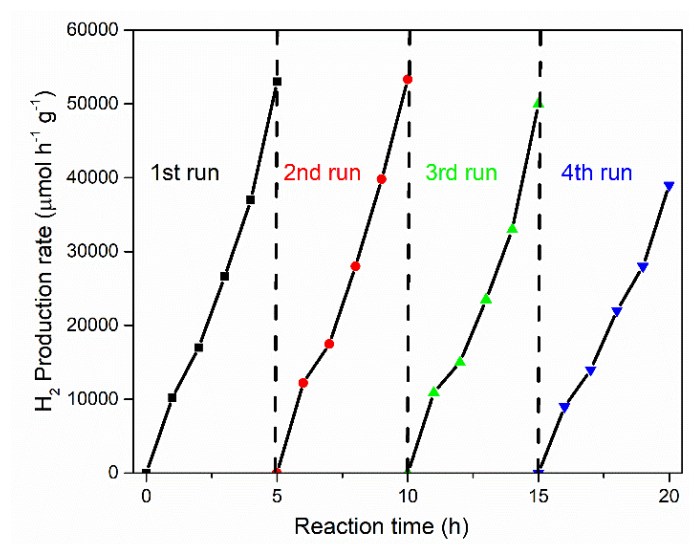

**Fig. S16.** Time course of H<sub>2</sub> production over Ni-CPNS@CdS over 20 hours test under visible light-driven catalytic processes

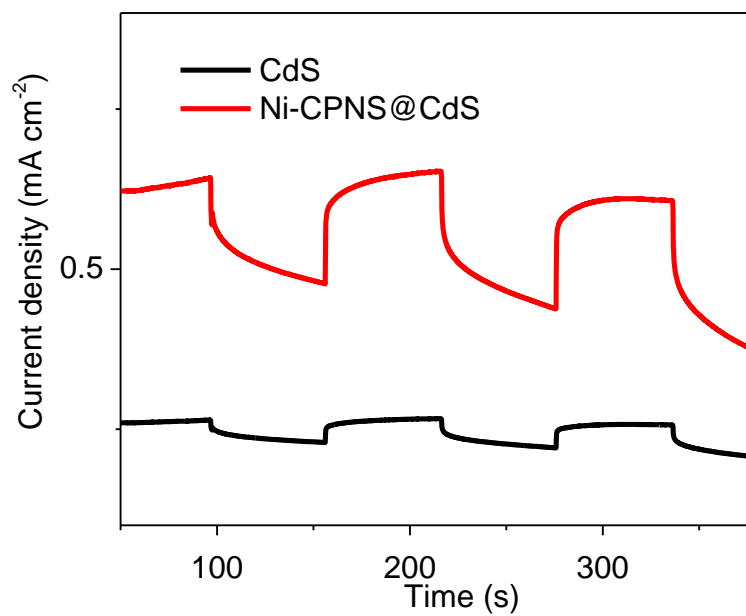

**Fig. S17.** Photocurrent tests of CdS nanoparticle and Ni-CPNS@CdS.

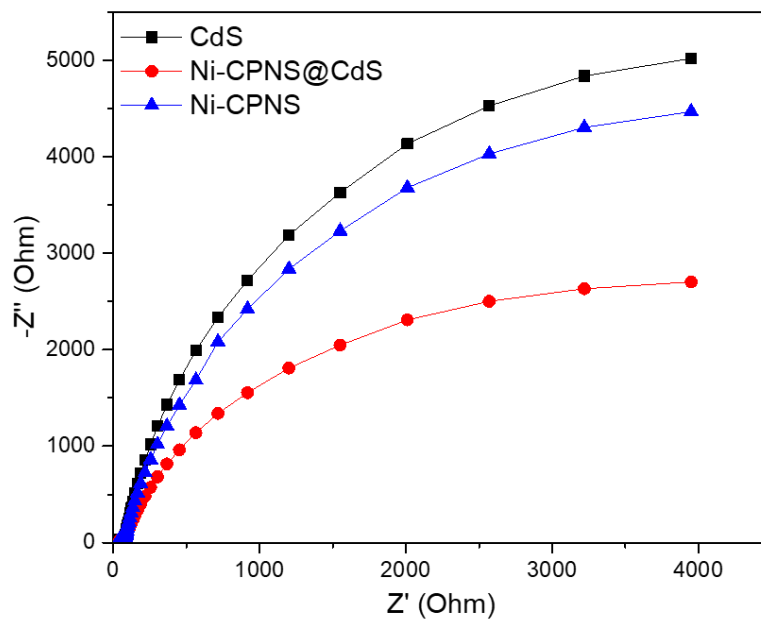

**Fig. S18.** EIS plots of CdS nanoparticle, Ni-CPNS and Ni-CPNS@CdS.

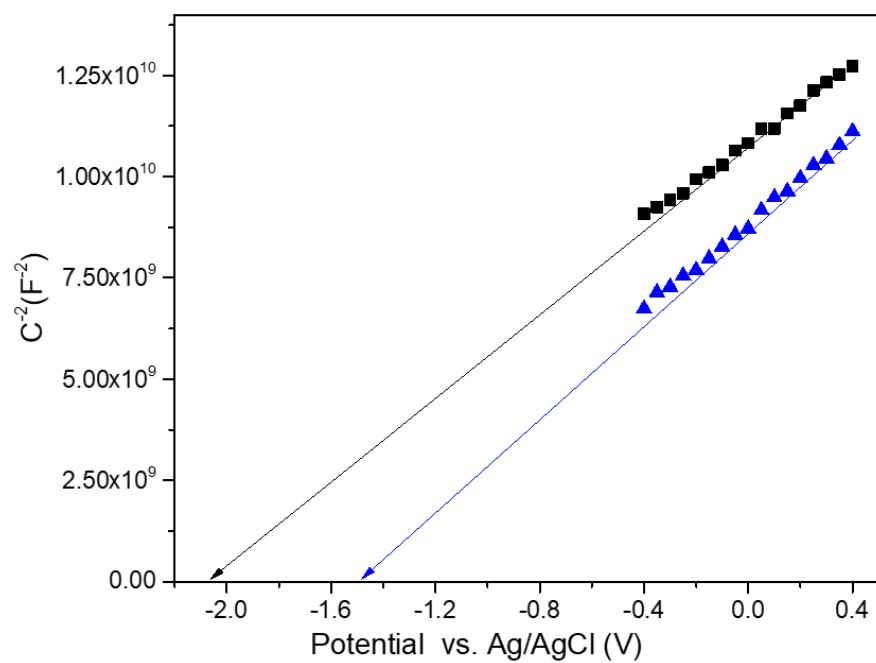

**Fig. S19.** Mott-Schottky plots of CdS (blue line) nanoparticle and Ni-CPNS@CdS (black line).

**Table S1.** The hydrogen production comparison of this work with other photocatalytic Co-catalyst.

| <b>Photocatalyst</b>           | <b>Co-catalyst</b>         | <b>H<sub>2</sub><br/>production<br/>Rate<br/>(<math>\mu\text{mol h}^{-1} \text{g}^{-1}</math>)</b> | <b>Ref.</b>                             |
|--------------------------------|----------------------------|----------------------------------------------------------------------------------------------------|-----------------------------------------|
| CdS/NiS                        | NiS                        | 1130                                                                                               | Phys. Chem. Chem. Phys. 2013, 15, 12088 |
| CdS/N-Graphene                 | N-Graphene                 | 1050                                                                                               | J. Phys. Chem. C 2011, 115, 11466       |
| CdS/NiO                        | NiO                        | 4460                                                                                               | Catal. Commun. 2013, 36, 104.           |
| CdS/NiO <sub>x</sub>           | NiO <sub>x</sub>           | 5910                                                                                               | Appl. Catal. B-Environ. 2014, 152, 68.  |
| UiO-66/CdS/RGO                 | UiO-66                     | 210                                                                                                | Chem. Commun. 2014, 50, 8533–8535       |
| CdS/MoS <sub>2</sub> -Graphene | MoS <sub>2</sub> /Graphene | 9000                                                                                               | ACS Nano 2014, 8, 7078                  |
| <b>Ni-CPNS@CdS</b>             | <b>Ni-CPNS</b>             | <b>10210</b>                                                                                       | <b>This work</b>                        |
